# Supplementary material for: Serum cystatin C predicts vancomycin trough levels better than serum creatinine in hospitalized patients: a cohort study
Source: PubMed Central journal article supplement (PMC4075252; doi:10.1186/cc13899), 2014-05-29
Supplement: cc13899-S1.pdf [file cc13899-S1.pdf]

**Additional file 1.** CKD-EPI eGFR predictive models for vancomycin trough with and without both BSA normalization for 1.73 m<sup>2</sup> and weight

| Model variable <sup>a</sup>                                       | Model fit<br>(R <sup>2</sup> ) |
|-------------------------------------------------------------------|--------------------------------|
| <b>Model 5: eGFR with CKD EPI<sub>creatinine</sub></b>            |                                |
| Intercept                                                         |                                |
| Vancomycin total dose (g)                                         |                                |
| Every 8 hour interval                                             |                                |
| Every 12 hour interval                                            |                                |
| Every 24 hour interval                                            |                                |
| <b>and</b>                                                        |                                |
| eGFR in mL/min/1.73m <sup>2</sup>                                 | 0.330                          |
| eGFR in mL/min/1.73m <sup>2</sup> and weight                      | 0.384                          |
| eGFR in mL/min <sup>b</sup>                                       | 0.394                          |
| eGFR in mL/min and weight <sup>b</sup>                            | 0.396                          |
| <b>Model 6: eGFR with CKD EPI<sub>cystatin C</sub></b>            |                                |
| Intercept                                                         |                                |
| Vancomycin total dose (g)                                         |                                |
| Every 8 hour interval                                             |                                |
| Every 12 hour interval                                            |                                |
| Every 24 hour interval                                            |                                |
| <b>and</b>                                                        |                                |
| eGFR in mL/min/1.73m <sup>2</sup>                                 | 0.525                          |
| eGFR in mL/min/1.73m <sup>2</sup> and weight                      | 0.544                          |
| eGFR in mL/min <sup>b</sup>                                       | 0.538                          |
| eGFR in mL/min and weight <sup>b</sup>                            | 0.538                          |
| <b>Model 7: eGFR with CKD EPI<sub>creatinine-cystatin C</sub></b> |                                |
| Intercept                                                         |                                |
| Vancomycin total dose (g)                                         |                                |
| Every 8 hour interval                                             |                                |
| Every 12 hour interval                                            |                                |
| Every 24 hour interval                                            |                                |
| <b>and</b>                                                        |                                |
| eGFR in mL/min/1.73m <sup>2</sup>                                 | 0.536                          |
| eGFR in mL/min/1.73m <sup>2</sup> and weight                      | 0.574                          |
| eGFR in mL/min <sup>b</sup>                                       | 0.580                          |
| eGFR in mL/min and weight <sup>b</sup>                            | 0.580                          |

<sup>a</sup>. Vancomycin total dose represents the cumulative grams of vancomycin given prior to trough level being drawn. Per the study definition this represents three doses of vancomycin therapy.

<sup>b</sup>: To convert from mL/min/1.73<sup>2</sup> multiply by [(0.007184\*Height (cm)<sup>0.725</sup>\*Weight (kg)<sup>0.425</sup>)/1.73] [37]
